# Supplementary material for: New Dothideomycetes from Freshwater Habitats in Spain
Source: MDPI journal article supplement (doi:10.3390/jof7121102), 2021-12-20
Supplement: s1 [file s1]

**Table S1.** Fungal taxa and their nucleotide sequences of the molecular markers used to build the phylogenetic trees.

| Taxon                             | Strain           | GenBank Accession No. |                 |                 |             |
|-----------------------------------|------------------|-----------------------|-----------------|-----------------|-------------|
|                                   |                  | ITS                   | <i>tub2</i>     | <i>rpb2</i>     | <i>tef1</i> |
| <i>Acericola italica</i>          | MFLUCC:13-0609   | NR_156344             |                 |                 |             |
| <i>Didymella brevipilosa</i>      | <b>FMR 17415</b> | <b>OU612373</b>       | <b>OU612358</b> | <b>OU612359</b> |             |
| <i>Didymella ellipsoidea</i>      | CGMCC3.18350     | KY742060              | KY742302        | KY742145        |             |
| <i>Didymella exigua</i>           | CBS 183.55       | GU237794              | GU237525        | EU874850        |             |
| <i>Didymella macrostoma</i>       | CBS 223.69       | GU237801              | GU237623        | KT389608        |             |
| <i>Didymella pteridis</i>         | CBS 379.96       | KT389504              | KT389801        | KT389624        |             |
| <i>Didymella rumicicola</i>       | CBS 683.79       | KT389503              | KT389800        | KT389622        |             |
| <i>Didymella subrosea</i>         | CBS 733.79       | NR_170787             | MT005643        | MT018174        |             |
| <i>Didymella viburnicola</i>      | CBS 523.73       | GU237879              | GU237667        | MH872477        |             |
| <i>Epicoccum nigrum</i>           | CBS 173.73       | FJ426996              | FJ427107        | KT389631        |             |
| <i>Epicoccum ovisporum</i>        | CBS 180.80       | FJ427068              | FJ427174        | LT623252        |             |
| <i>Epicoccum plurivorum</i>       | CBS 558.81       | GU237888              | GU237647        | KT389634        |             |
| <i>Heterophoma adonidis</i>       | CBS 114309       | MH862963              | KT389803        | KT389637        |             |
| <i>Heterophoma nobilis</i>        | CBS 507.91       | NR_170721             | GU237603        | KT389638        |             |
| <i>Heterophoma polypusiformis</i> | <b>FMR17837</b>  | <b>OU612367</b>       | <b>OU600611</b> | <b>OU600610</b> |             |
| <i>Heterophoma poolensis</i>      | CBS 113.20       | MH854684              | GU237638        | MT018056        |             |

|                                        |                  |                 |                 |                 |                 |
|----------------------------------------|------------------|-----------------|-----------------|-----------------|-----------------|
| <i>Heterophoma sylvatica</i>           | CBS 874.97       | GU237907        | GU237662        | MT018052        |                 |
| <i>Heterophoma verbascicola</i>        | CGMCC 3.18364    | NR_158268       | GU237650        | KY742187        |                 |
| <i>Heterophoma verbasci-densiflori</i> | CBS 449.81       | MN973474        | MT005573        | MT018049        |                 |
| <i>Jeremyomyces labinae</i>            | CBS:144647       | NR_163362       | MK442733        | MK442665        | <b>OU600603</b> |
| <i>Neoconiothyrium hakeae</i>          | CPC 27620        | NR_154839       | KY173600        | KY173583        |                 |
| <i>Neoconiothyrium multiporum</i>      | CBS 353.65       | MH858605        |                 |                 |                 |
| <i>Neoconiothyrium persooniae</i>      | CBS 143175       | MG386041        |                 |                 |                 |
| <i>Neoconiothyrium sp.</i>             | <b>FMR 17669</b> | <b>OU641117</b> | <b>OU641013</b> | <b>OU641014</b> |                 |
| <i>Neoconiothyrium viticola</i>        | CPC 36397        | MN562123        |                 | MN556804        |                 |
| <i>Neophaeosphaeria agaves</i>         | CBS:136429       | NR_137833       |                 |                 |                 |
| <i>Neophaeosphaeria filamentosa</i>    | CBS 102202       | JF740259        |                 | GU357803        | GU349084        |
| <i>Paraboeremia adianticola</i>        | CBS 187.83       | GU237796        | GU237576        | KP330401        |                 |
| <i>Paraboeremia camelliae</i>          | CGMCC3.18106     | KX829034        | KX829058        | KX829050        |                 |
| <i>Paraboeremia clausa</i>             | <b>FMR 18597</b> | <b>OU612369</b> | <b>OU600598</b> | <b>OU600597</b> |                 |
| <i>Paraboeremia clausa</i>             | <b>FMR 18598</b> | <b>OU612371</b> | <b>OU600600</b> | <b>OU600599</b> |                 |
| <i>Paraboeremia litseae</i>            | CGMCC3.18109     | KX829029        | KX829053        | KX829045        |                 |
| <i>Paraboeremia oligotrophica</i>      | CGMCC3.18111     | KX829031        | KX829055        | KX829047        |                 |
| <i>Paraboeremia putaminum</i>          | CBS 299.39       | MN823454        | MN824628        | MN824480        |                 |
| <i>Paraboeremia rekkeri</i>            | CBS 144955       | MN823511        | MN824685        | MN824537        |                 |

|                                         |                  |                 |                 |                 |                 |
|-----------------------------------------|------------------|-----------------|-----------------|-----------------|-----------------|
| <i>Paraboeremia selaginellae</i>        | CBS 122.93       | GU237762        | GU237656        | LT623255        |                 |
| <i>Paraboeremia taiwanensis</i>         | NTUCC 17-013     | MK840826        | MK839232        | MK839234        |                 |
| <i>Paraboeremia truini</i>              | CBS 144952       | MN823495        | MN824669        | MN824521        |                 |
| <i>Paraphoma aquatica</i>               | <b>FMR 16956</b> | <b>OU612361</b> | <b>OU612355</b> | <b>OU612357</b> | <b>OU612356</b> |
| <i>Paraphoma dioscoreae</i>             | CBS 135100       | KF251167        | KF252662        |                 |                 |
| <i>Paraphoma chrysanthemicola</i>       | CBS 172.70       | KF251165        | KF252660        |                 |                 |
| <i>Paraphoma fimeti</i>                 | UTHSC:DI16-296   | LT796872        | KF252665        | LT797032        | LT797112        |
| <i>Paraphoma melnikiae</i>              | MF-9.88          | MG764063        | MG779456        | MG779466        |                 |
| <i>Paraphoma radicina</i>               | UTHSC:DI16-209   | LT796835        | KF252667        | LT796995        | LT797075        |
| <i>Paraphoma raphiolepidis</i>          | CBS 142524       | KY979758        | KY979924        | KY979851        |                 |
| <i>Paraphoma vinacea</i>                | UMPV004          | KU176887        | KU176895        |                 |                 |
| <i>Phaeosphaeria breonadiae</i>         | CBS 141334       | NR_155675       |                 |                 |                 |
| <i>Phaeosphaeria caricicola</i>         | CBS 603.86       | KF251182        | KF252676        |                 |                 |
| <i>Phaeosphaeria fructigena</i>         | <b>FMR 17808</b> | <b>OU612363</b> | <b>OU600608</b> | <b>OU600607</b> | <b>OU600609</b> |
| <i>Phaeosphaeria glyceriae-plicatae</i> | CBS 101261       | MH862724        |                 |                 |                 |
| <i>Phaeosphaeria juncophila</i>         | CBS 575.86       | AF439488        |                 |                 | GU456283        |
| <i>Phaeosphaeria lutea</i>              | CBS 455.84       | MH861760        |                 |                 |                 |
| <i>Phaeosphaeria norfolcia</i>          | CBS 593.86       | MH861997        |                 |                 |                 |
| <i>Phaeosphaeria olivacea</i>           | MUTITA 2854      | MG813228        |                 |                 |                 |

|                                         |                  |                 |                 |                 |                 |
|-----------------------------------------|------------------|-----------------|-----------------|-----------------|-----------------|
| <i>Phaeosphaeria parvula</i>            | CBS 605.86       | MH862001        |                 |                 |                 |
| <i>Phaeosphaeriopsis glaucopunctata</i> | MFLUCC:13-0220   | KJ522473        | KF252693        |                 | MG520918        |
| <i>Phaeosphaeriopsis triseptata</i>     | MFLUCC:13-0271   | KJ522475        |                 | KJ522485        | MG520919        |
| <i>Setomelanomma holmii</i>             | CBS 110217       | KT389542        |                 | GU371800        | GU349028        |
| <i>Vacuiphoma bulgarica</i>             | CBS 357.84       |                 |                 |                 |                 |
| <i>Vacuiphoma oculihominis</i>          | UTHSC:DI16-308   |                 |                 |                 |                 |
| <i>Xenophoma microspora</i>             | <b>FMR 17947</b> | <b>OU612365</b> | <b>OU600605</b> | <b>OU600604</b> | <b>OU600606</b> |
| <i>Xenophoma puncteliae</i>             | CBS 128022       | JQ238617        | KP170711        | <b>OU600601</b> | <b>OU600602</b> |
| <i>Xenoseptoria neosaccardoi</i>        | CBS 120.43       | KF251280        | KF252761        |                 |                 |

<sup>1</sup>**CBS**: Culture collection of the Westerdijk Biodiversity Institute, Utrecht, The Netherlands; **CGMCC**: China General Microbiological Culture Collection Center; **FMR**: Facultat de Medicina, Reus, Spain; **CPC**: Culture Collection of Pedro Crous; **MFLUCC**: Mae Fah Luang University Culture Collection, Chiang Rai, Thailand; **NTUCC**: National Taiwan University Culture Collection; **UMPV**: University of Melbourne, *Paraphoma vinacea* strain **UTHSC**, Fungus Testing Laboratory at the University of Texas Health Science Center, San Antonio, Texas, USA

<sup>2</sup>Strains studied by us are indicated in **bold**.

<sup>T</sup>Ex-type strain.

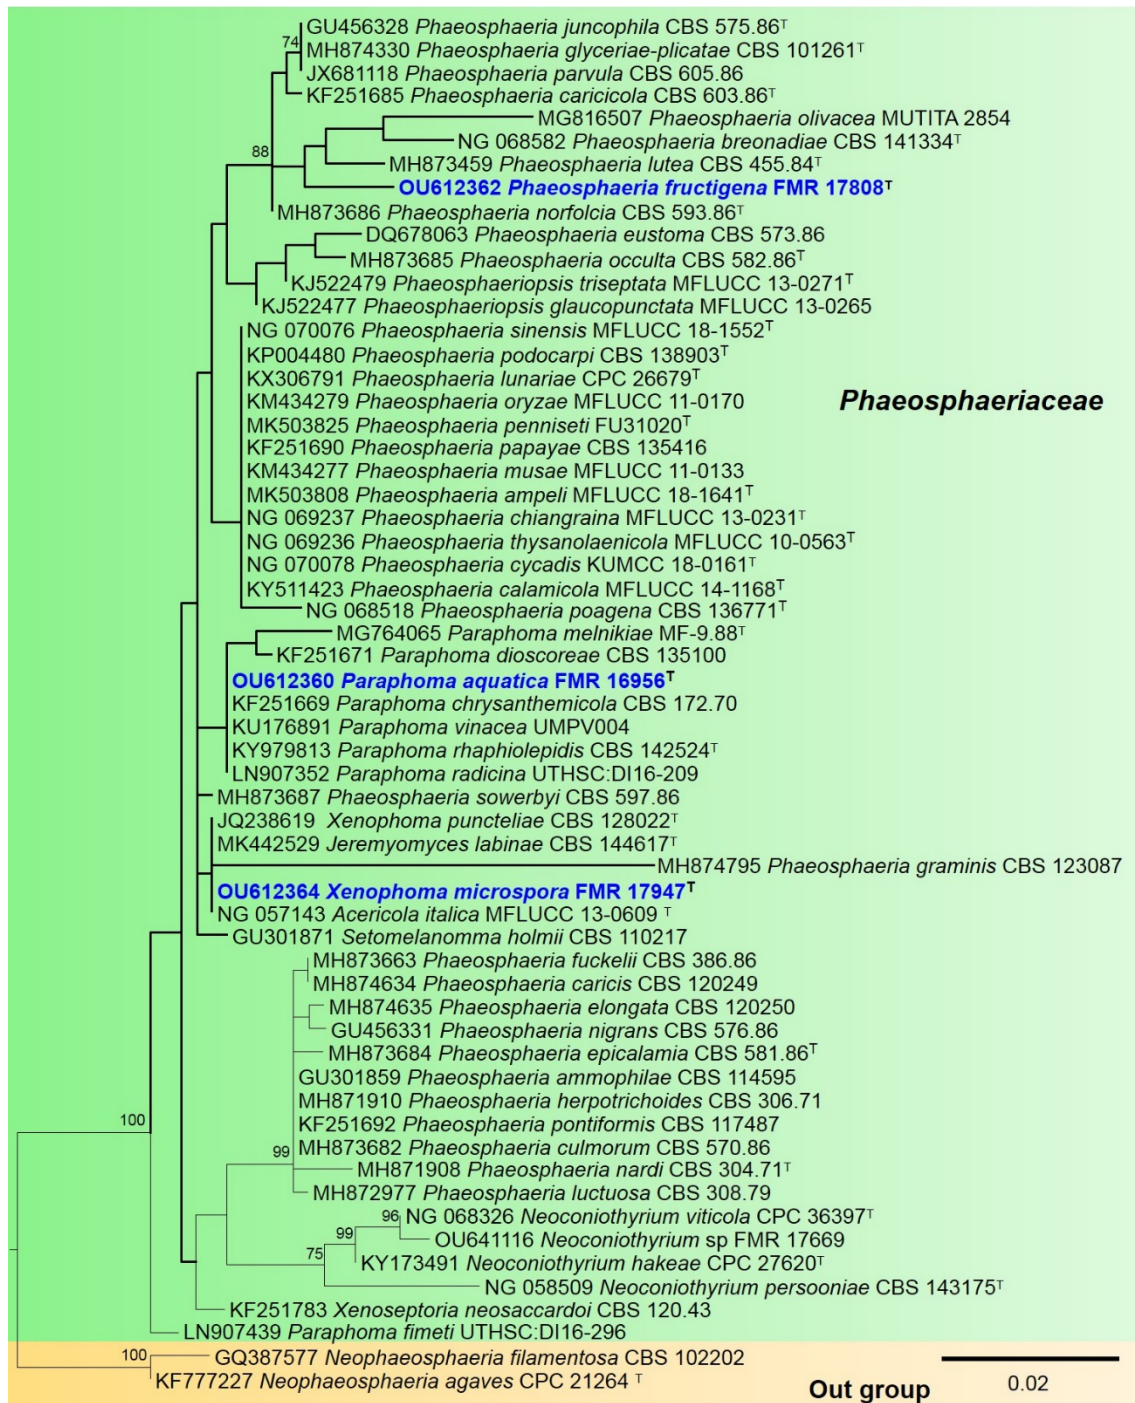

**Figure S1** ML phylogenetics tree of *Phaeosphaeriaceae* inferred from the LSU sequences of 59 strains. Support in nodes is indicated above by bootstrap values of 70% or higher. The tree was rooted with *Neophaeosphaeria agaves* CBS 136429 and *Neophaeosphaeria filamentosa* CBS 102202. Alignment length 713 b.p. Newly proposed taxa are given in blue. Type strains are indicated by a superscript <sup>T</sup>.
